# Supplementary material
Source: Springer Nature journal article supplement (https://www.springermedizin.de/resource/supplementary/13075_2011_3215_MOESM2_ESM.pdf/9694012)

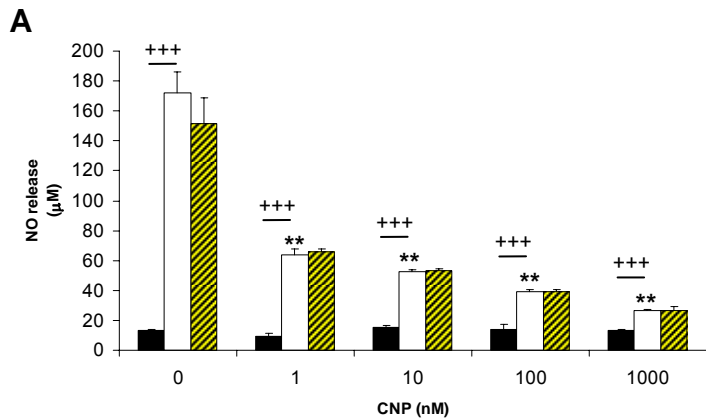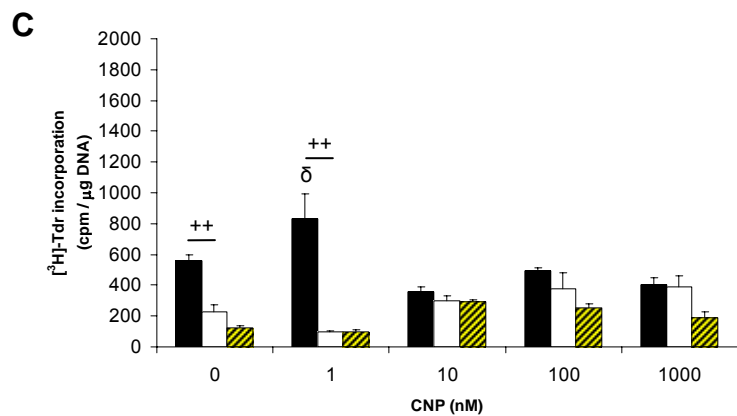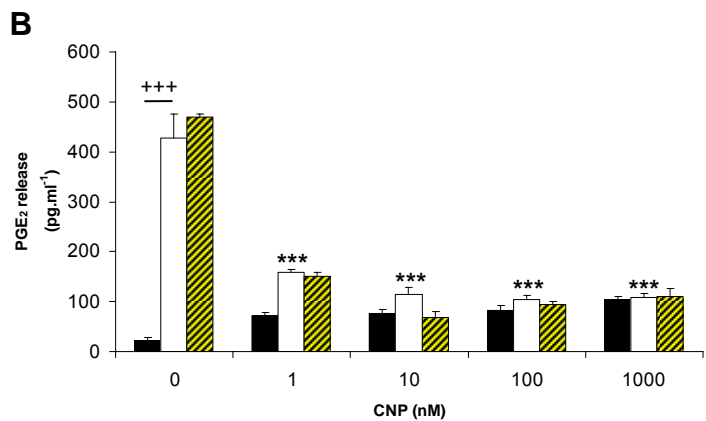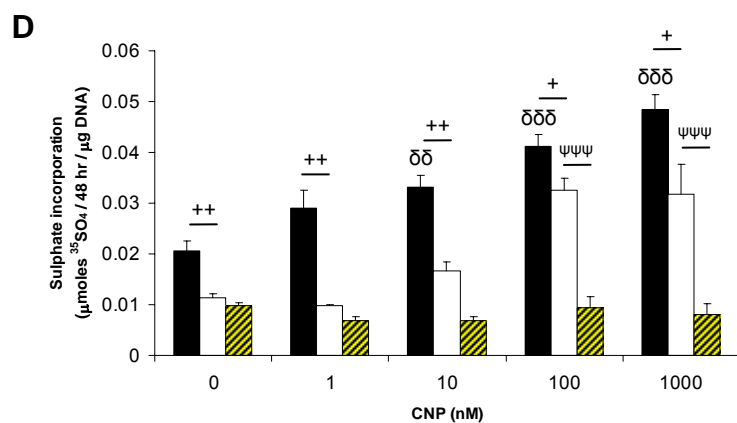

CNP
  CNP + IL-1 $\beta$ 
 CNP + IL-1 $\beta$  + KT5823

Supplement: MOESM2 [file 9694012]
